# Supplementary material for: Grafting of the gold surface by heterocyclic moieties derived through electrochemical oxidation of amino triazole – an experimental and “ab initio” study
Source: Royal Society of Chemistry journal article supplement (doi:10.1039/d2ra03125f), 2022-01-01

wide:1(180529\_VH\_bareAu)

XPS Spectrum Lens Mode:Hybrid Resolution:Pass energy 160 Iris(Aper):slot(Slot)  
Acqn. Time(s): 198 Sweeps: 3 Anode:Mono(Al (Mono))(150 W) Step(meV): 1000.0  
Dwell Time(ms): 60 Charge Neutraliser :Off Acquired On :18/05/29 11:42:20

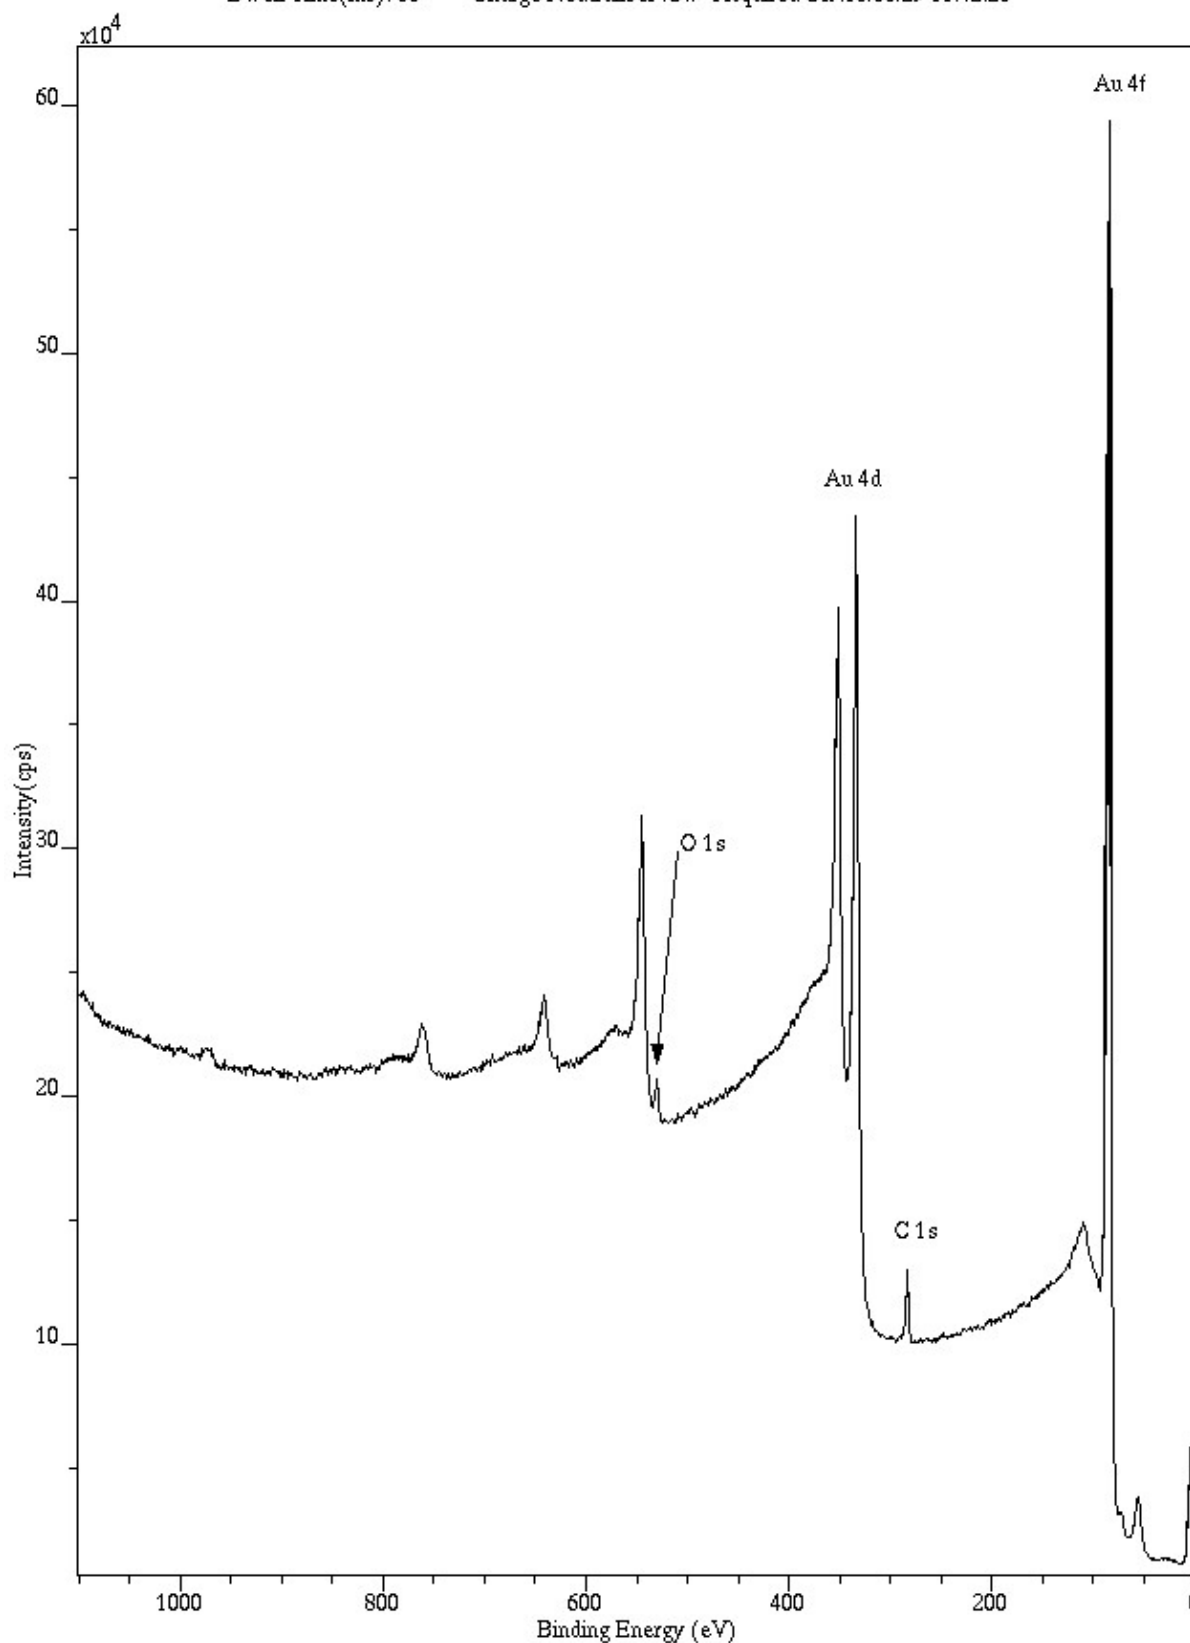

○ 1s:(180529\_VH\_bareAu)

XPS Spectrum Lens Mode:Hybrid Resolution:Pass energy 20 Iris(Aper):slot(Slot)  
Acqn. Time(s): 724 Sweeps: 12 Anode:Mono(Al (Mono))(150 W) Step(meV): 100.0  
Dwell Time(ms): 331 Charge Neutraliser :Off Acquired On :18/05/29 11:47:56

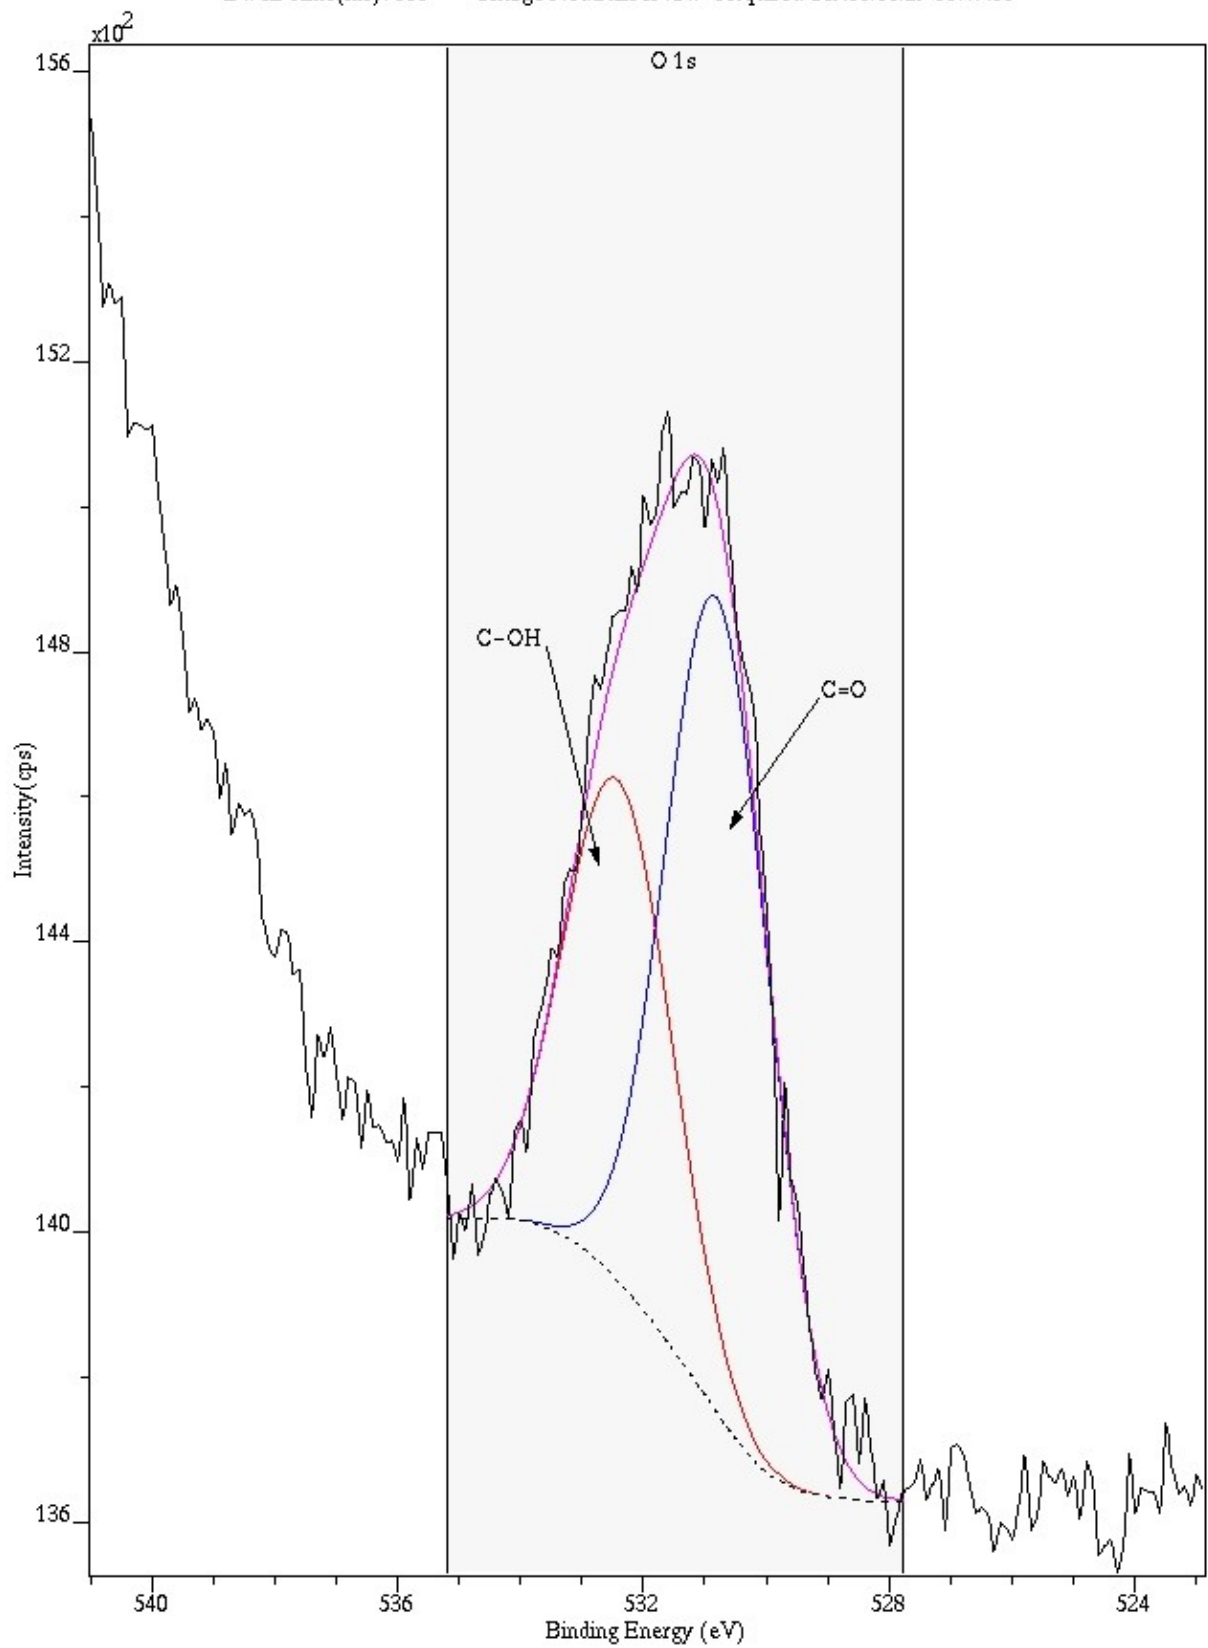

C 1s:3(180529\_VH\_bareAu)

XPS Spectrum Lens Mode:Hybrid Resolution:Pass energy 20 Iris(Aper):slot(Slot)  
Acqn. Time(s): 603 Sweeps: 10 Anode:Mono(Al (Mono))(150 W) Step(meV): 100.0  
Dwell Time(ms): 260 Charge Neutraliser :Off Acquired On :18/05/29 11:47:56

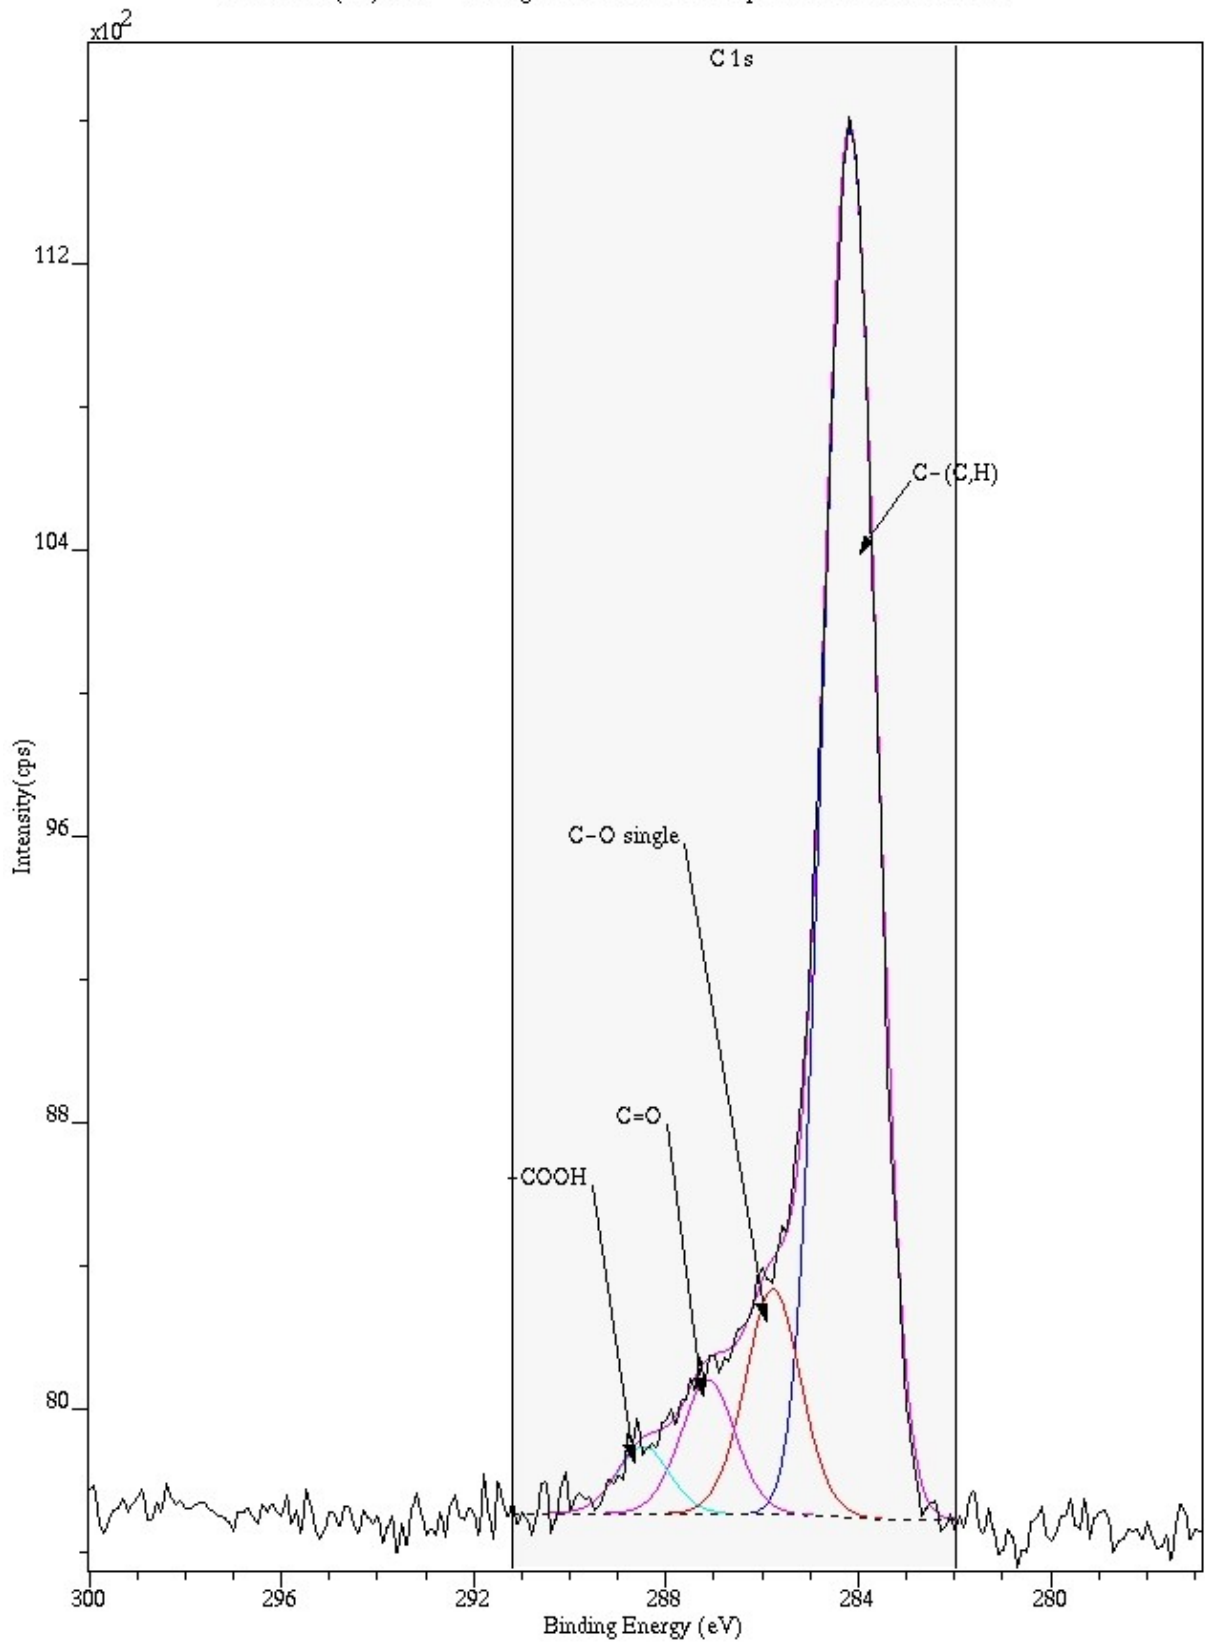

Au 4f(180529\_VH\_bareAu)

XPS Spectrum Lens Mode:Hybrid Resolution:Pass energy 20 Iris(Aper):slot(Slot)  
Acqn. Time(s): 181 Sweeps: 3 Anode:Mono(Al (Mono))(150 W) Step(meV): 100.0  
Dwell Time(ms): 458 Charge Neutraliser :Off Acquired On :18/05/29 11:47:56

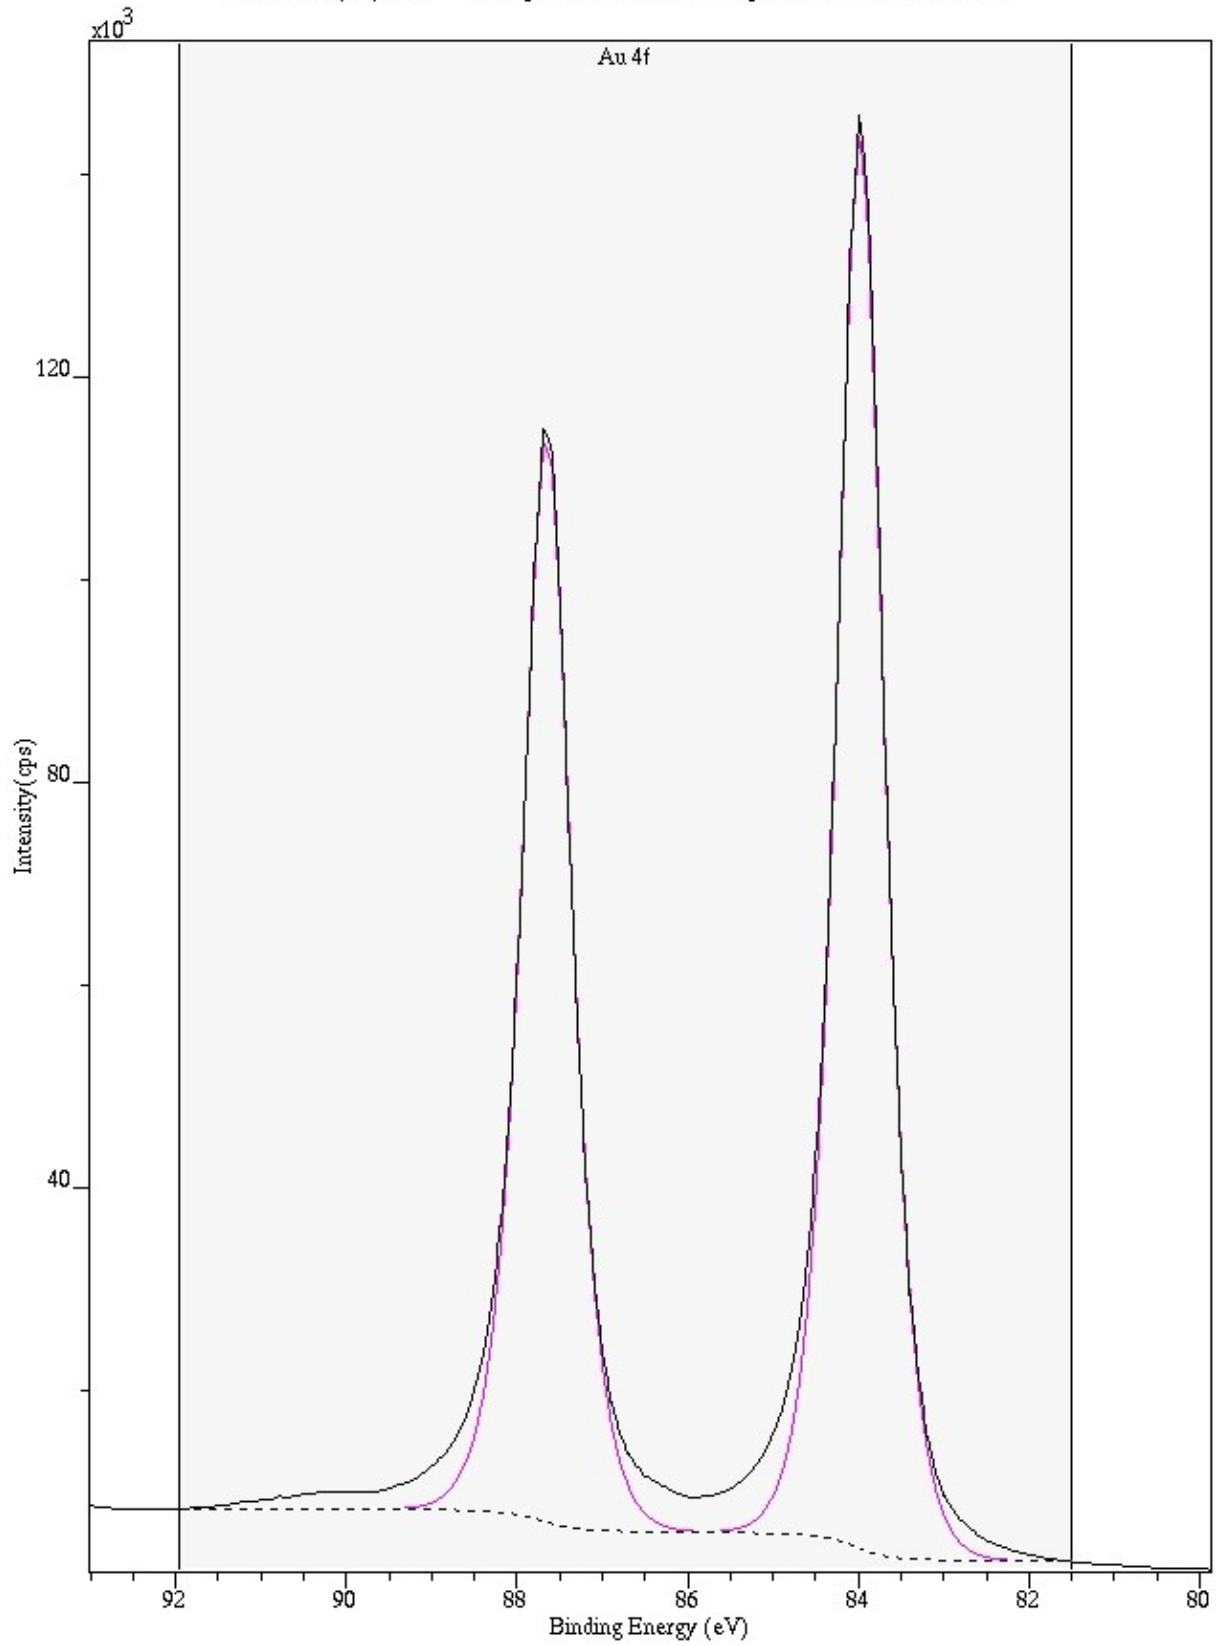

Supplement: d2ra03125f1.pdf [file d2ra03125f1.pdf]
