# Supplementary material for: Grafting of the gold surface by heterocyclic moieties derived through electrochemical oxidation of amino triazole – an experimental and “ab initio” study
Source: Royal Society of Chemistry journal article supplement (doi:10.1039/d2ra03125f), 2022-01-01

wide:1(180530\_NG\_oxidat\_Au)

XPS Spectrum Lens Mode:Hybrid Resolution:Pass energy 160 Iris(Aper):slot(Slot)  
Acqn. Time(s): 198 Sweeps: 3 Anode:Mono(Al (Mono))(150 W) Step(meV): 1000.0  
Dwell Time(ms): 60 Charge Neutraliser :Off Acquired On :18/05/30 13:22:27

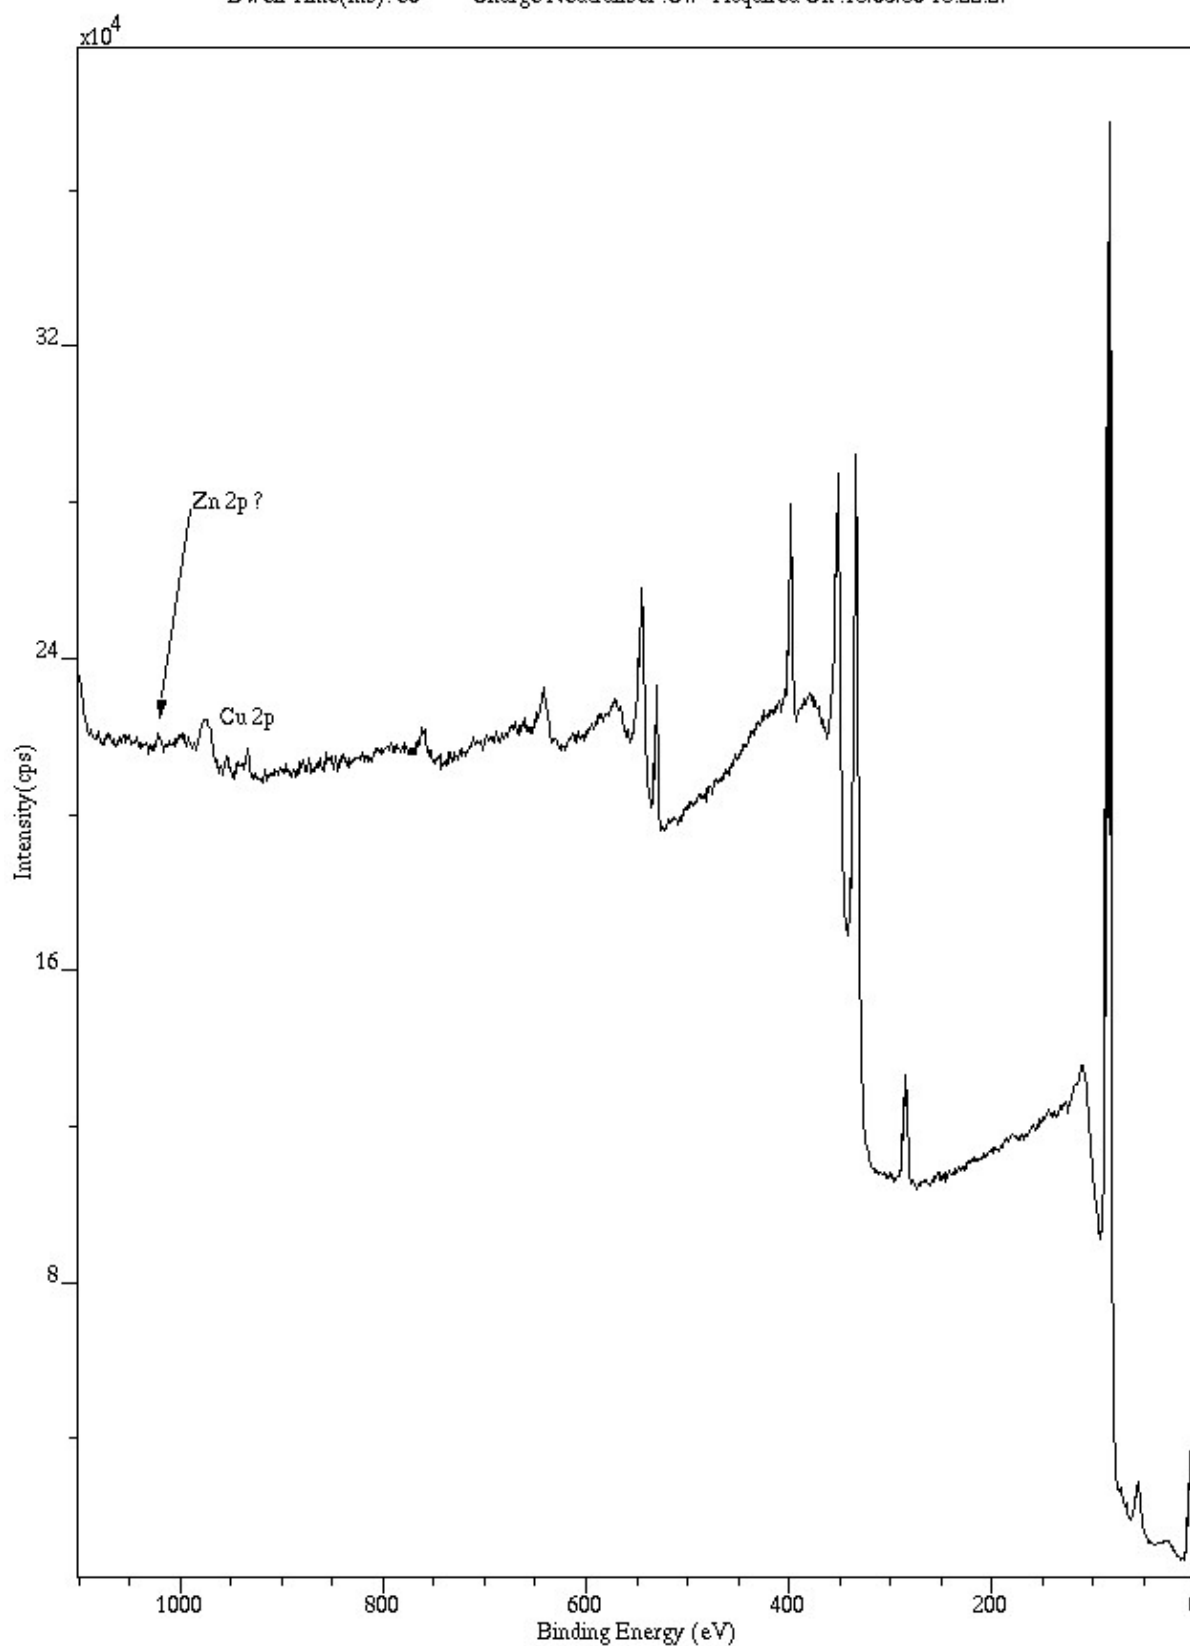

O 1s:2(180530\_NG\_oxidat\_Au)

XPS Spectrum Lens Mode:Hybrid Resolution:Pass energy 20 Iris(Aper):slot(Slot)  
Acqn. Time(s): 724 Sweeps: 12 Anode:Mono(Al (Mono))(150 W) Step(meV): 100.0  
Dwell Time(ms): 331 Charge Neutraliser :Off Acquired On :18/05/30 13:28:11

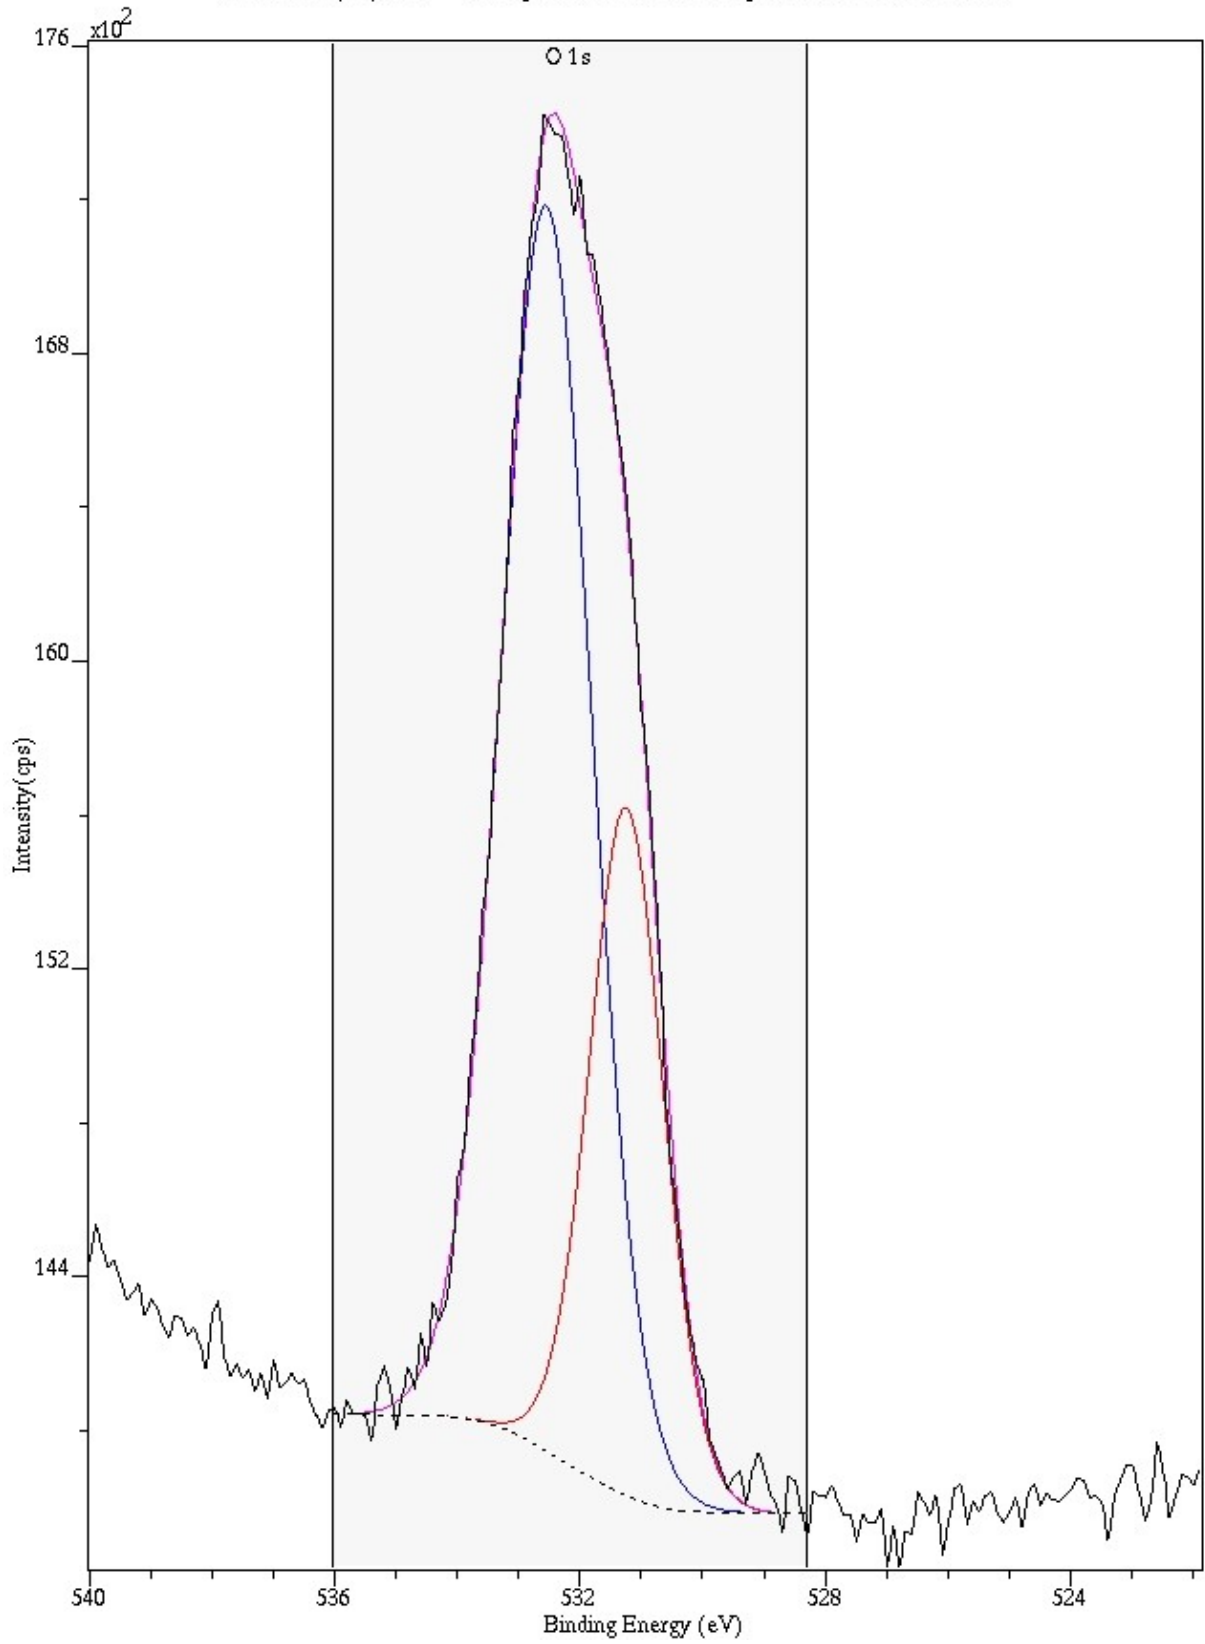

N 1s:3(180530\_NG\_oxidat\_Au)

XPS Spectrum Lens Mode:Hybrid Resolution:Pass energy 20 Iris(Aper):slot(Slot)  
Acqn. Time(s): 422 Sweeps: 7 Anode:Mono(Al (Mono))(150 W) Step(meV): 100.0  
Dwell Time(ms): 299 Charge Neutraliser :Off Acquired On :18/05/30 13:28:11

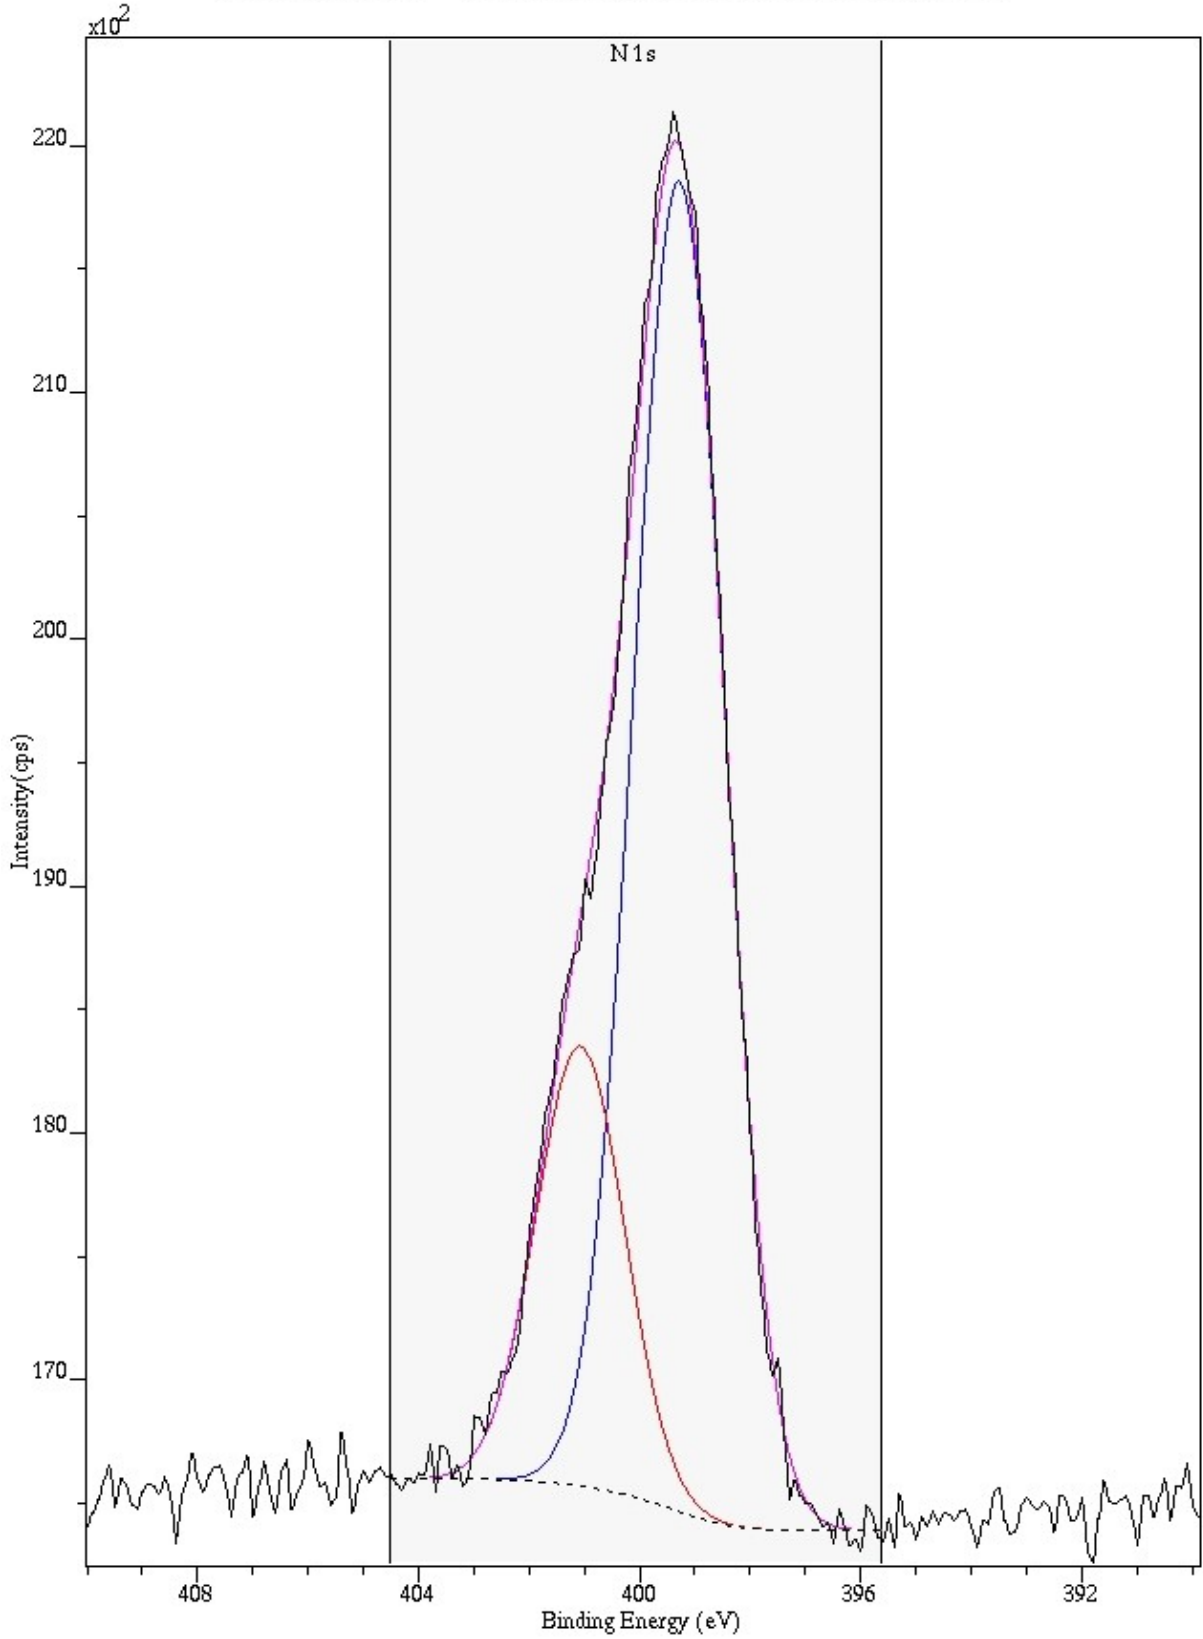

C 1s:4(180530\_NG\_oxidat\_Au)

XPS Spectrum Lens Mode:Hybrid Resolution:Pass energy 20 Iris(Aper):slot(Slot)  
Acqn. Time(s): 422 Sweeps: 7 Anode:Mono(Al (Mono))(150 W) Step(meV): 100.0  
Dwell Time(ms): 260 Charge Neutraliser :Off Acquired On :18/05/30 13:28:11

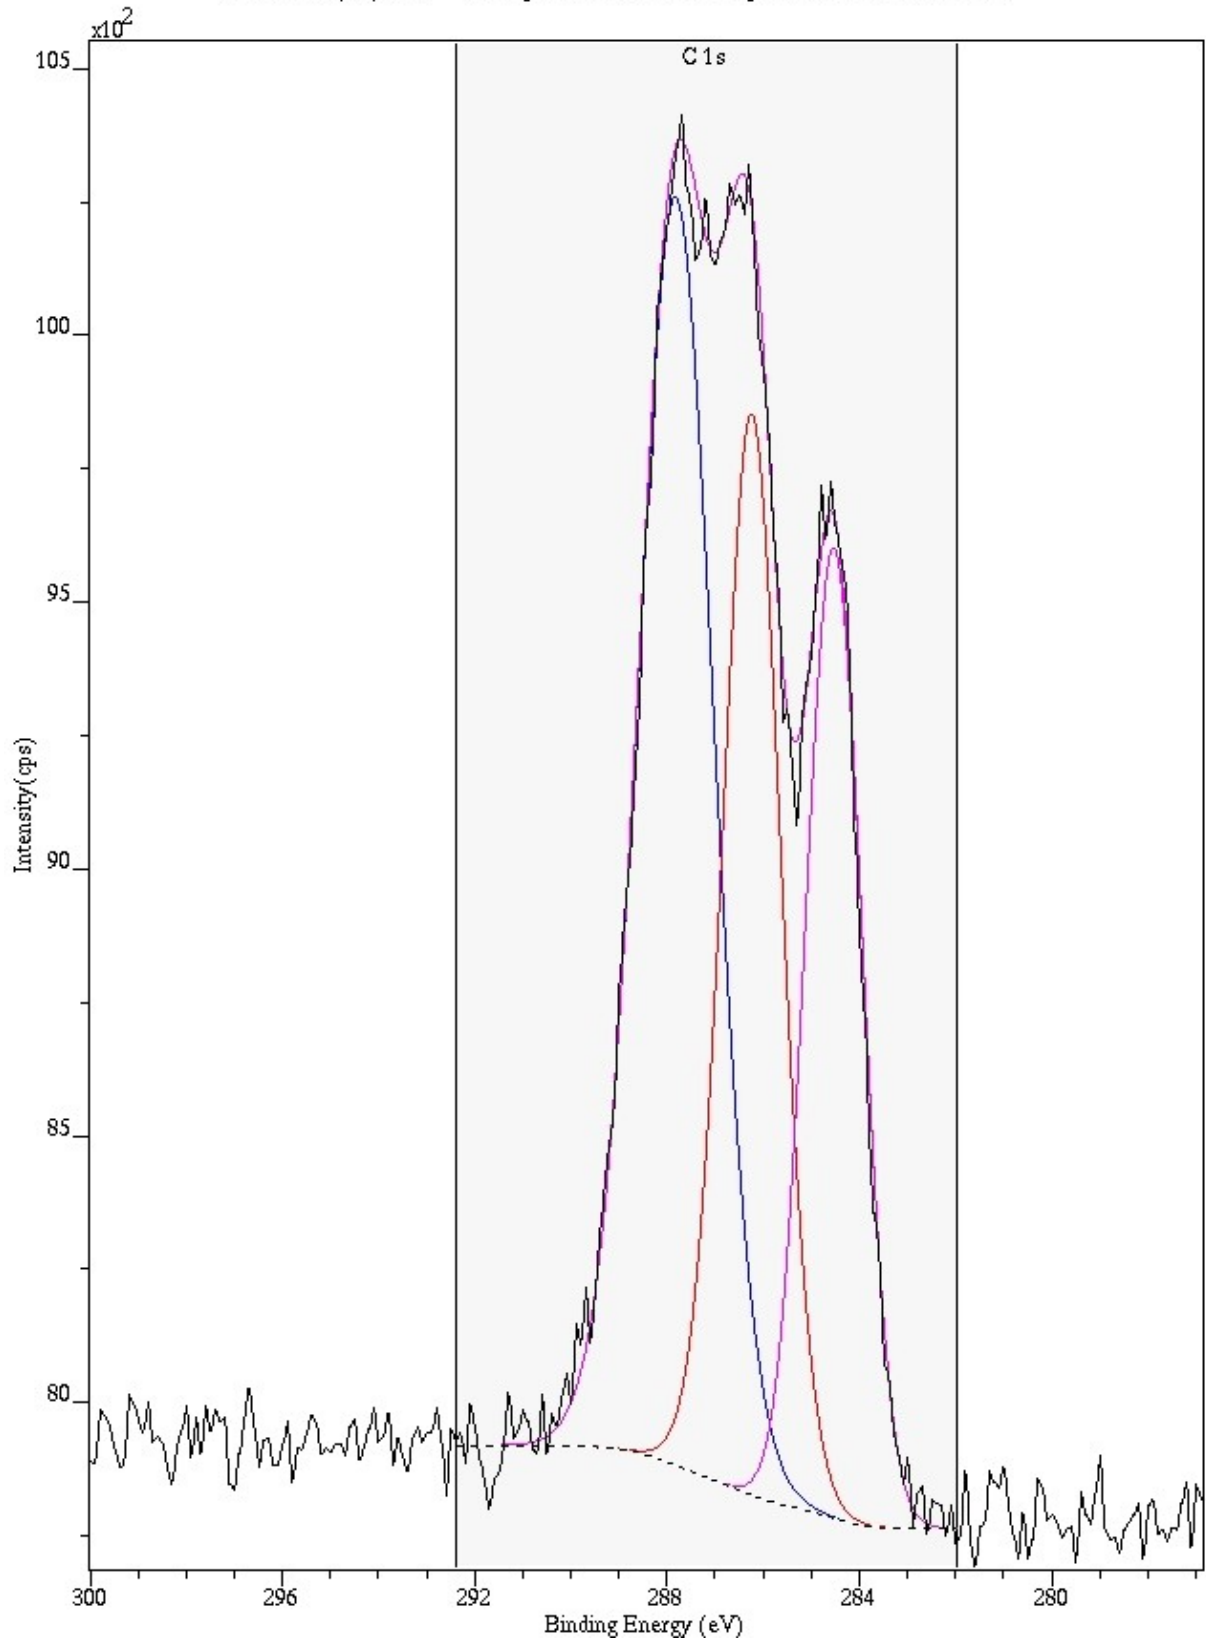

Au 4f.5(180530\_NG\_oxidat\_Au)

XPS Spectrum Lens Mode:Hybrid Resolution:Pass energy 20 Iris(Aper):slot(Slot)  
Acqn. Time(s): 242 Sweeps: 4 Anode:Mono(Al (Mono))(150 W) Step(meV): 100.0  
Dwell Time(ms): 458 Charge Neutraliser :Off Acquired On :18/05/30 13:28:11

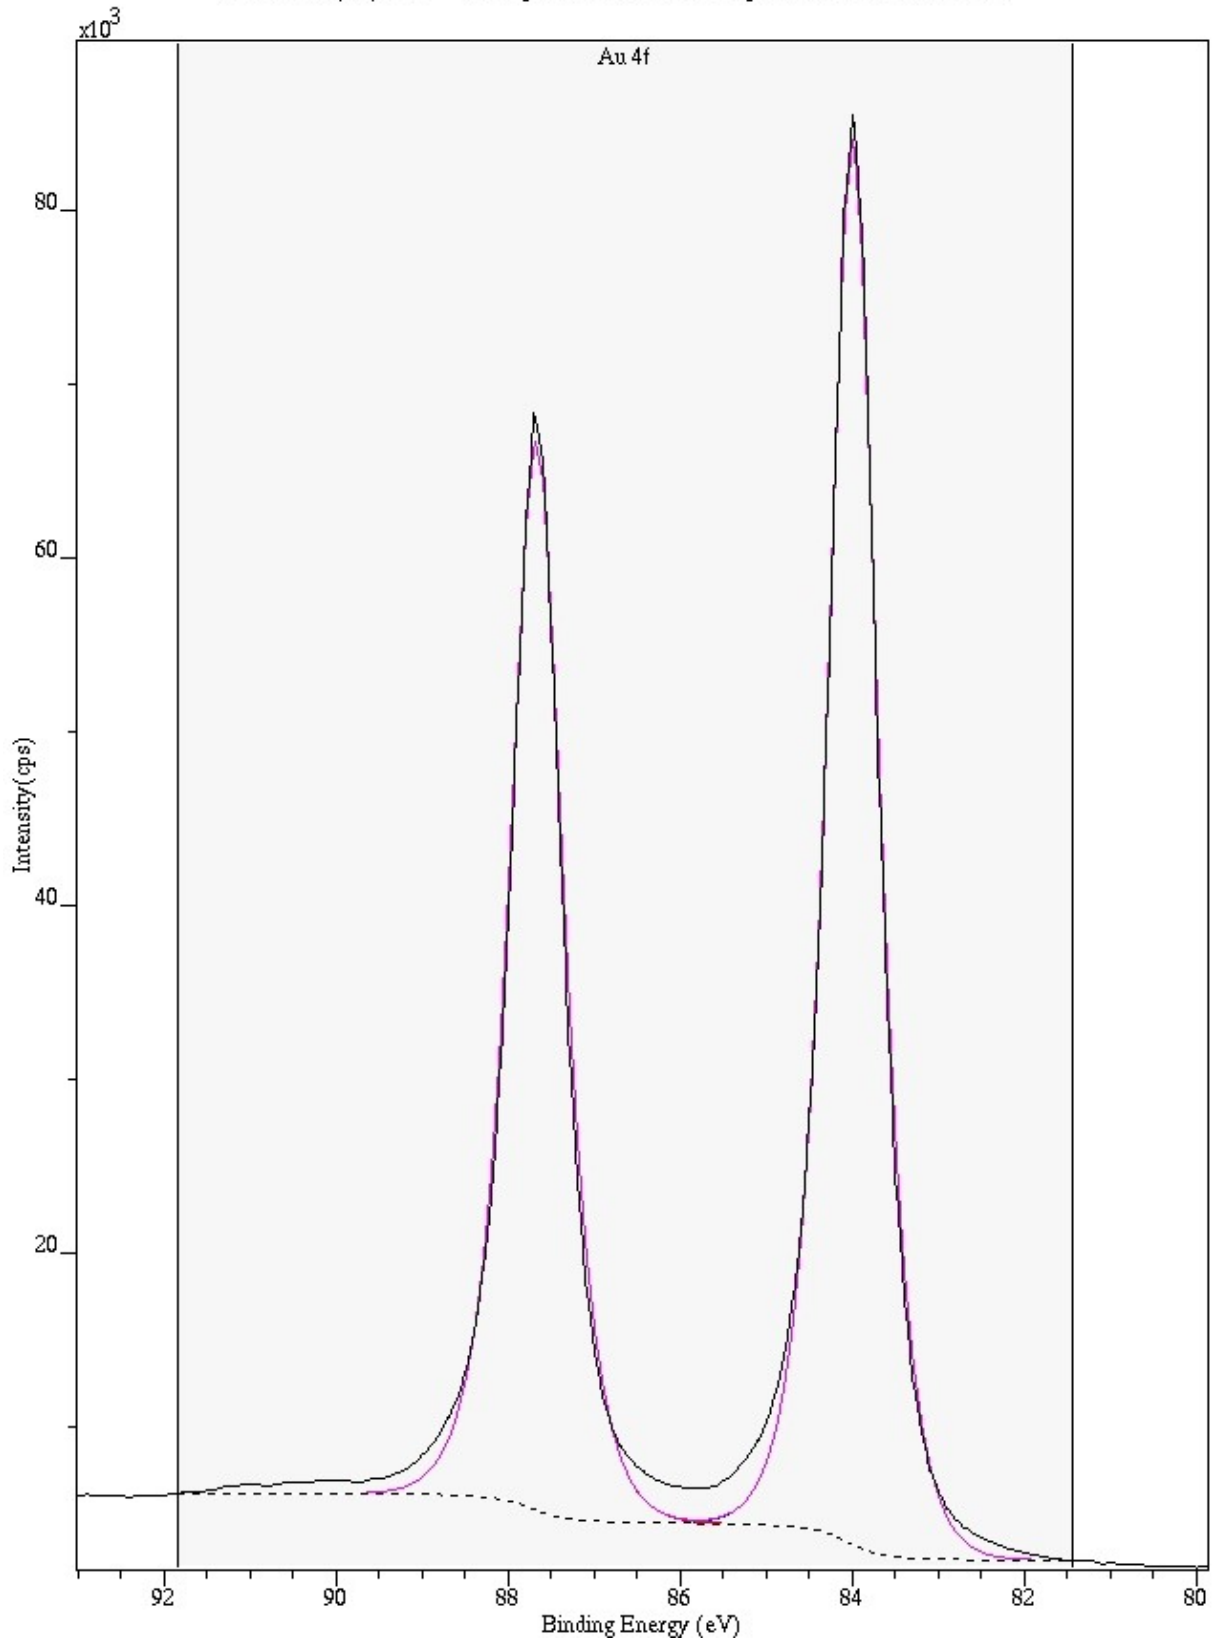

Supplement: d2ra03125f2.pdf [file d2ra03125f2.pdf]
